# Supplementary material for: Outcomes of the Advanced Visualization In Corneal Surgery Evaluation (ADVISE) trial; a non-inferiority randomized control trial to evaluate the use of intraoperative OCT during Descemet membrane endothelial keratoplasty
Source: bioRxiv or medRxiv preprint supplement (doi:10.1101/2022.01.18.22269460), 2022-01-21
Supplement: Supplementary file [file media-1.pdf]

Supplementary table 1. Logistic regression models for incidence of total adverse event rate

| <b>Variables</b>          | <b>Unadjusted model</b>  |          | <b>Adjusted model</b>    |          |
|---------------------------|--------------------------|----------|--------------------------|----------|
|                           | <b>OR (95%CI)</b>        | <b>P</b> | <b>OR (95%CI)</b>        | <b>P</b> |
| iOCT-optimized protocol   | 1.036<br>(0.454 - 2.366) | 0.933    | 0.976<br>(0.421 – 2.263) | 0.955    |
| Study site 2 <sup>1</sup> | -                        | -        | 0.123<br>(0.016 – 0.953) | 0.045    |
| Study site 3 <sup>1</sup> | -                        | -        | 0.634<br>(0.221 – 1.819) | 0.396    |

<sup>1</sup> Reference: study site 1

iOCT: intraoperative optical coherence tomography
