# Supplementary material for: Outcomes of the Advanced Visualization In Corneal Surgery Evaluation (ADVISE) trial; a non-inferiority randomized control trial to evaluate the use of intraoperative OCT during Descemet membrane endothelial keratoplasty
Source: bioRxiv or medRxiv preprint supplement (doi:10.1101/2022.01.18.22269460), 2022-01-21
Supplement: Supplementary file [file media-2.pdf]

Supplementary table 2. Overview of graft unfolding grade in both treatment arms

| Treatment arm / Graft unfolding grade <sup>1</sup> |                                           | I | II | III | IV | P-value <sup>2</sup> |
|----------------------------------------------------|-------------------------------------------|---|----|-----|----|----------------------|
| Conventional protocol, n                           |                                           | 4 | 14 | 4   | 11 | 0.474                |
| iOCT-optimized protocol, n                         |                                           | 7 | 14 | 1   | 9  |                      |
|                                                    | iOCT aided surgical decision-making       | 1 | 4  | 1   | 7  | 0.011                |
|                                                    | iOCT did not aid surgical decision-making | 6 | 10 | 0   | 2  |                      |

<sup>1</sup> Graft unfolding grade is classified in 4 grades depending on the required manipulation and time to unfold/position the graft. Grade I: graft lamella primarily oriented correctly in the anterior chamber, straight and direct unfolding and centering; Grade II: slightly complicated, indirect unfolding and centering (duration less than five min); Grade III: difficult indirect unfolding and centering (duration longer than five min), repeated air injection with BSS exchange necessary; Grade IV: direct manipulation of the graft lamella for unfolding and centering by cannula or forceps.

<sup>2</sup> Fisher exact test
